# Supplementary material for: Recurrent WNT pathway alterations are frequent in relapsed small cell lung cancer
Source: PubMed Central journal article supplement (PMC6141466; doi:10.1038/s41467-018-06162-9), 2018-09-17
Supplement: 41467_2018_6162_MOESM3_ESM.pdf [file 41467_2018_6162_MOESM3_ESM.pdf]

## Description of Additional Supplementary Files

File Name: Supplementary Data 1

Description: *Sample Details*: Clinical characteristics, treatment history, and sample information for the relapsed SCLC cohort.

File Name: Supplementary Data 2

Description: *Immunohistochemical Features of SCLC Samples*: pathologist scoring of histopathological stains for various disease-relevant markers in cohort samples.

File Name: Supplementary Data 3

Description: *Significantly Mutated Genes*: list of genes identified as significantly recurrently mutated in relapsed SCLC cohort by MuSiC analysis.

File Name: Supplementary Data 4

Description: – *Significant Copy Number Alterations*: list of loci and constituent genes with significant copy number alterations in relapsed SCLC cohort by GISTIC analysis.

File Name: Supplementary Data 5

Description: *Relapse Genes*: list of genes identified as relapse-acquired (present only in relapse for primary-relapse pairs) or relapse-only (present only in relapsed samples, not primaries).

File Name: Supplementary Data 6

Description: *Pan-cancer Gene List*: list of previously identified significant pan-cancer genes, and the number of mutations observed across primary, paired relapse, and all relapse tumors.

File Name: Supplementary Data 7

Description: – *Canonical WNT Pathway Gene List*: list of previously identified WNT signaling genes, and the number of mutations observed across primary, paired relapse, and all relapse tumors.

File Name: Supplementary Data 8

Description: *Sample Work Orders*: a brief description of sample type and mapping of samples to work orders (Supplementary Data 9).

File Name: Supplementary Data 9

Description: *Work Order Details*: a description of sequencing protocols and characteristics related to each work order.

File Name: Supplementary Data 10

Description: *All SNVs and Indels*: somatic single nucleotide variants and small insertions and deletions observed across all tumor samples.

File Name: Supplementary Data 11

Description: – *Significantly Mutated Gene Loss of Heterozygosity Calls*: loss of heterozygosity calls as determined by zygosity score thresholding across all significantly mutated genes (Supplementary Data 3).

File Name: Supplementary Data 12

Description: *sGSEA Enrichment Scores*: enrichment scores across 4 distinct gene expression signatures for RNA samples from this and previous studies.
